# Supplementary material
Source: ML conference proceedings conference paper supplement (https://proceedings.mlr.press/v139/dass21a.html)
Supplement: Supplementary file [file dass21a-supp.pdf]

# SUPPLEMENTARY

## Householder Sketch for Accurate and Accelerated Least-Mean-Squares Solvers

Jyotikrishna Dass and Rabi Mahapatra  
Texas A&M University

June 11, 2021

### APPENDIX

#### A. Theorems and Proofs

**Theorem 2.2** (Householder Sketch). *Let  $X \in \mathbb{R}^{n \times d}$  be the original data matrix,  $y \in \mathbb{R}^n$  be the corresponding output label or response vector, and  $n \gg d$ . Let  $X = QR$  be Householder QR decomposition. Then,  $(R, Q^T y)$  is a memory-efficient and theoretically accurate sketch of original data  $(X, y)$  such that  $X^T X = R^T R$ , and has memory footprint of  $(\frac{d(d+3)}{2})$  elements, computed in time  $O(nd^2)$ .*

*Proof.* From Equations 1 and 2, and  $X = QR$ , where  $QQ^T = Q^T Q = I$

$$\|Xw - y\|_2 = \|QRw - y\|_2 = \|QRw - QQ^T y\|_2 = \|Q\|_2 \|Rw - Q^T y\|_2 = \|Rw - Q^T y\|_2$$

**(Accurate sketch)** So, it is possible to replace the original data  $(X, y)$  used in existing LMS solvers with  $(R, Q^T y)$  which preserves the covariance  $X^T X = R^T Q^T Q R = R^T R$  and solves the optimization problem accurately. For example, Ridge regression with ridge parameter  $\lambda$  solves  $(X^T X + \lambda I)w = X^T y$  in primal form which can be reformulated to  $(R^T R + \lambda I)w = R^T(Q^T y)$ .

**(Memory savings)**  $R$  is a  $d \times d$  upper triangular matrix with  $(\frac{d(d-1)}{2})$  elements above the diagonal and  $d$  on the diagonal resulting in  $(\frac{d(d+1)}{2})$  elements compared to original data matrix  $X$  that has  $nd$  elements.  $Q^T y$  is a reflected response vector. It is to be noted that only top  $d$  rows of  $Q^T$  will be sufficient to compute  $Q^T y$  since  $n \gg d$ . Hence, reflected response vector  $(Q^T y)$  is of size  $d$  compared to the original LMS formulation with response vector  $y$  of size  $n$ . Hence, the total memory footprint of  $(R, Q^T y)$  is  $O(\frac{d(d+3)}{2})$  elements which makes it memory-efficient than the original  $(X, y)$  occupying  $n(d+1)$  space.

**(Time complexity)** The above sketch  $(R, Q^T y)$  is computed via Householder QR decomposition (HOUSEHOLDER-QR in Step 1 of Algorithm 1) of  $X$  which generates upper triangular matrix,  $R$ , and orthonormal matrix  $Q$  that is internally stored as Householder reflectors. The time complexity of the above decomposition is  $O(nd^2 - d^3/3)$  (Golub & Van Loan, 2012). Calculation of  $Q^T y$  is done implicitly by applying Householder reflectors to the response vector  $y$  (MULTIPLY-QC in Step 2 of Algorithm 1) in time  $O(nd)$  (Golub & Van Loan, 2012). Hence, it can be seen that the total computation time for the sketch  $(R, Q^T y)$  is  $O(nd^2 + nd - d^3/3)$  which results in  $O(nd^2)$  for  $n \gg d$ .  $\square$

**Theorem 2.3.** Let  $X \in \mathbb{R}^{n \times d}$ ,  $y \in \mathbb{R}^n$ ,  $(R, Q^T y) := \text{HOUSEHOLDER-SKETCH}(X, y)$  that accelerates primal ridge solver via RIDGE-QR. Then,  $(R, Q^T y)$  is also the Householder sketch for the corresponding Kernel Ridge Regression problem that accelerates the dual problem via KERNELRIDGE-QR, and solves it with the same memory and time complexity, independent of data size  $(n)$ , as that of primal RIDGE-QR.

*Proof.* Kernel Ridge Regression with original data  $(X, y)$  solves  $(K + \lambda I)\beta = y$ , where,  $K \in \mathbb{R}^{n \times n}$  is the Kernel matrix, and  $\beta \in \mathbb{R}^n$  is the vector of dual variables. For any pair of row vectors in input data,  $x_i, x_j \in \mathbb{R}^{1 \times d}$ , each element of Kernel matrix  $K(i, j) = \kappa(x_i, x_j)$ , where  $\kappa(\cdot)$  is a Reproducing Kernel Hilbert Space (RKHS) kernel function such that  $\kappa(x_i, x_j) = \langle \phi(x_i), \phi(x_j) \rangle$  and  $\phi(\cdot)$  is transformation from input space to RKHS feature space (Burgess, 1998).

For a **linear kernel function**,  $\kappa(x_i, x_j) = x_i x_j^T$ ,  $K = XX^T$ , and the objective is to solve the equation  $(XX^T + \lambda I)\beta = y$  such that the model coefficient in input space,  $w = X^T \beta$ . By applying  $X = QR$  via HOUSEHOLDER-QR( $X$ ), the above dual problem reformulates to

$$\begin{aligned} & (XX^T + \lambda I)\beta = y \\ \Rightarrow & (QRR^T Q^T + \lambda I)\beta = y \\ \Rightarrow & (QRR^T Q^T + \lambda QQ^T)\beta = y \\ \Rightarrow & Q(RR^T Q^T + \lambda Q^T)\beta = y \\ \Rightarrow & (RR^T Q^T + \lambda Q^T)\beta = Q^T y \\ \Rightarrow & (RR^T + \lambda I)\bar{\beta} = \bar{y} \end{aligned}$$

where,  $\bar{y} = Q^T y$  and  $\bar{\beta} = Q^T \beta$ . The model coefficients in the input space,

$$w = X^T \beta = R^T Q^T \beta = R^T \bar{\beta}$$

Hence, solving  $(XX^T + \lambda I)\beta = y$ , system of  $n$  equations in  $n$  unknowns in KERNELRIDGE with original  $(X, y)$  is equivalent to solving a much smaller system of  $d$  equations in  $d$  unknowns ( $n \gg d$ ), **accurately** and **faster**, with  $(RR^T + \lambda I)\bar{\beta} = \bar{y}$  in KERNELRIDGE-QR with memory-efficient  $(R, Q^T y)$  sketch. It is worth noting here that once  $(R, Q^T y)$  sketch is available, the memory and time complexity for solving *dual* in KERNELRIDGE-QR is **independent** of data size  $n$ , and is **same** to that of solving the same problem in *primal* form via RIDGE-QR. Figure 4(a) demonstrates the the above similarity in solving RIDGE-QR, and KERNELRIDGE-QR (with linear kernel) based on computation time. Moreover, KERNELRIDGE-QR calculates the model coefficient  $w$  using a triangular matrix in  $w = R^T \bar{\beta}$  in  $d^2$  flops compared to  $(2n - 1)d$  flops for  $w = X^T \beta$  in the original KERNELRIDGE with  $(X, y)$ .

For any **non-linear kernel** function such as Radial Basis Function, it is possible to represent  $K \approx AA^T$  with some low-rank matrix,  $A \in \mathbb{R}^{n \times k}$  via any kernel approximation techniques (Williams & Seeger, 2001; Si et al., 2017). This can be followed by constructing memory-efficient  $(R, Q^T y) := \text{HOUSEHOLDER-SKETCH}(A, y)$  from Algorithm 1. Now, solving the approximated *dual* problem formulation for non-linear kernels via KERNELRIDGE-QR is equivalent in space and time complexity to solving the approximated problem in *primal* form via RIDGE-QR on  $(R, Q^T y)$ . Moreover, any of the above RIDGE-QR or KERNELRIDGE-QR is faster than solving the *primal* form via RIDGE with  $(A, y)$ .

Hence,  $(R, Q^T y)$  is also the Householder sketch for Kernel Ridge Regression, where,  $R$  is defined based on linear or non-linear kernel, for accelerating the *dual* problem via KERNELRIDGE-QR.  $\square$

**Theorem 3.1** (Distributed Householder-QR (Dass et al., 2018)). *Let  $X = (X_1^T | \dots | X_p^T)^T$ , where,  $X_i \in \mathbb{R}^{\hat{n} \times d}$  be local data matrix of parallel worker,  $i = 1, \dots, p$ , where  $\hat{n} \gg d$ , and,  $n = p\hat{n}$ . Let,  $X_i = Q_i R_i$  be constructed via local HOUSEHOLDER-QR (see Algorithm 1) for each  $i = 1, \dots, p$ , in parallel. Then,  $X = QR$  for the complete data matrix can be constructed exactly, such that  $Q = \text{diag}(Q_1, \dots, Q_p)Q_M$ , and  $R = R_M$ , where  $R_{stack} = Q_M R_M$  via another HOUSEHOLDER-QR on  $R_{stack} = (R_1^T | \dots | R_p^T)^T$  gathered from all workers. The above DISTRIBUTED HOUSEHOLDER-QR has a computational time complexity of  $O(\frac{n}{p}d^2)$ , with a communicated data volume of  $(\frac{d(d+1)}{2})$  elements by each worker.*

*Proof.*

$$X = \begin{pmatrix} X_1 \\ X_2 \\ \cdot \\ \cdot \\ X_p \end{pmatrix} = \begin{pmatrix} Q_1 R_1 \\ Q_2 R_2 \\ \cdot \\ \cdot \\ Q_p R_p \end{pmatrix} = \text{diag}(Q_1, \dots, Q_p) \begin{pmatrix} R_1 \\ R_2 \\ \cdot \\ \cdot \\ R_p \end{pmatrix}$$

Let us define,  $R_{stack} = \begin{pmatrix} R_1 \\ R_2 \\ \cdot \\ \cdot \\ R_p \end{pmatrix} = Q_M R_M$ , via HOUSEHOLDER-QR in Algorithm 1 (or Theorem 2.1). Then,

$$X = \text{diag}(Q_1, \dots, Q_p) R_{stack} = \text{diag}(Q_1, \dots, Q_p) Q_M R_M$$

Also, it is given that  $X = QR$  via HOUSEHOLDER-QR on complete matrix  $X$ . Hence,  $Q = \text{diag}(Q_1, \dots, Q_p)Q_M$ , is the orthogonal matrix, and,  $R = R_M$  is the upper triangular matrix.

**Time complexity and Communication volume.** For a given local data  $X_i \in \mathbb{R}^{\hat{n} \times d}$ , where,  $n = \hat{n}p$ , each  $X_i = Q_i R_i$  at  $i$ -th parallel worker is computed via local HOUSEHOLDER-QR (as per Algorithm 1, and Theorem 2.1). From Theorem 2.2, each local HOUSEHOLDER-QR takes  $O(\hat{n}d^2 - d^3/3)$ , in parallel for all the workers. Subsequently,  $R_{stack} = Q_M R_M$  is performed via master HOUSEHOLDER-QR in time  $O(\times pd \times d^2 - d^3/3)$ , where,  $R_{stack} \in \mathbb{R}^{pd \times d}$  is obtained by *gathering* (communicating) local upper-triangular matrices  $R_i \in \mathbb{R}^{d \times d}$ , i.e.,  $(\frac{d(d+1)}{2})$  elements from each parallel worker  $i = 1, \dots, p$  to the master ( $i = 1$ ). Hence, total computation time for DISTRIBUTED HOUSEHOLDER-QR is  $O(\hat{n}d^2 + pd^3 - 2d^3/3)$  or  $O(\frac{n}{p}d^2)$  for  $\hat{n} \gg d$  (i.e.  $n \gg pd$ ). It is worth noticing that the above computational time is dominant by local HOUSEHOLDER-QR as observed in Figure 2(a).  $\square$

**Corollary 3.1.1** (Distributed Multiply-Qc). *Let  $c = (c_1^T | \dots | c_p^T)^T \in \mathbb{R}^n$ , where,  $c_i \in \mathbb{R}^{\hat{n}}$  be some local vector at parallel worker with local data matrix  $X_i$ ,  $i = 1, \dots, p$ , where  $\hat{n} \gg d$ , and,  $n = p\hat{n}$ . Let, orthogonal matrices  $Q_M$ , and  $Q_i$ ,  $i = 1, \dots, p$  be constructed via DISTRIBUTED HOUSEHOLDER-QR as per Theorem 3.1 such that  $Q = \text{diag}(Q_1, \dots, Q_p)Q_M$ . Then, the reflected vector,  $Q^T c$  (or  $Qc$ ) can be constructed exactly by making  $(p + 1)$  calls to MULTIPLY-QC (see Step 2 in Algorithm 1) such that  $Q^T c = Q_M^T ((Q_1^T c_1)^T | \dots | (Q_p^T c_p)^T)^T$  or,  $Qc = \text{diag}(Q_1, \dots, Q_p)Q_M(c_1^T | \dots | c_p^T)^T$ . The above DISTRIBUTED MULTIPLY-QC has a computational time complexity of  $O(\frac{n}{p}d + pd^2)$ , with a communicated data volume of  $(d)$  elements by each worker.*

*Proof.* From Theorem 3.1, for  $X = (X_1^T | \dots | X_p^T)^T$ , its corresponding orthogonal matrix  $Q = \text{diag}(Q_1, \dots, Q_p)Q_M$ . Hence,

$$Q^T = Q_M^T \text{diag}(Q_1^T, \dots, Q_p^T)$$

For a given vector  $c \in \mathbb{R}^n$ ,  $Q^T c$  via MULTIPLY-QC (Step 2 in Algorithm 1) can be equivalently computed from  $c = (c_1^T | \dots | c_p^T)^T$  comprising local vector  $c_i \in \mathbb{R}^{\hat{n}}$ , where,  $i = 1, \dots, p$ , as follows

$$Q^T c = Q_M^T \text{diag}(Q_1^T, \dots, Q_p^T) c = Q_M^T \begin{pmatrix} Q_1^T c_1 \\ Q_2^T c_2 \\ \cdot \\ \cdot \\ Q_p^T c_p \end{pmatrix}$$

In DISTRIBUTED MULTIPLY-QC algorithm, the above is implemented as follows. Each worker,  $i = 1, \dots, p$ , computes its local reflected vectors  $Q_i^T c_i \in \mathbb{R}^d$  via MULTIPLY-QC (refer Step 2 in Algorithm 1) in parallel with time  $O(2\hat{n}d)$  as shown in Theorem 2.2. Once these local reflected vectors, each of size  $d$  elements are *gathered* (communicated) from each worker to the master, a stacked vector  $\left( (Q_1^T c_1)^T | \dots | (Q_p^T c_p)^T \right)^T \in \mathbb{R}^{pd \times d}$  is constructed. Then, a master MULTIPLY-QC is applied on this stacked vector using  $Q_M^T$  in time  $O(2 \times pd \times d)$ , i.e.,  $O(2pd^2)$ . Hence, total computation time of DISTRIBUTED MULTIPLY-QC is  $O(2\hat{n}d + 2pd^2)$ , i.e.,  $O(\frac{n}{p}d + pd^2)$ , since  $n = \hat{n}p$ .  $\square$

## B. Figures

For more clarity, we provide enlarged figures from Section 4 (Experiments and Results) of the main paper. Following is the organization of figures in the supplementary document.

**Figure 1:** (a)(b) Page 6 , (c)(j) Page 7 , (d)(e)(f) Page 8 , (g)(h)(i) Page 9, (k)(l) Page 10

**Figure 2:** (a)(b)(c) Page 11

**Figure 3:** (a)(b)(c) Page 12 , (d)(e)(f) Page 13

**Figure 4:** (a)(b)(c) Page 14

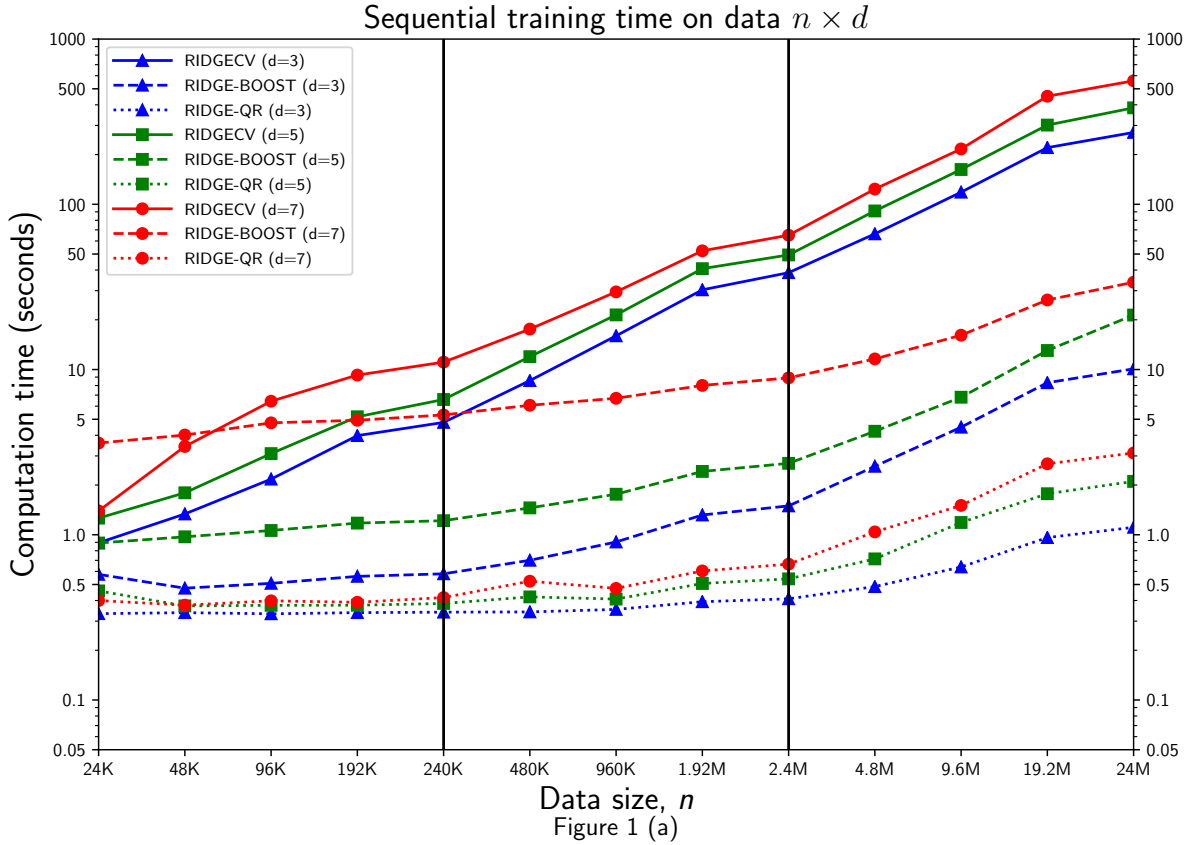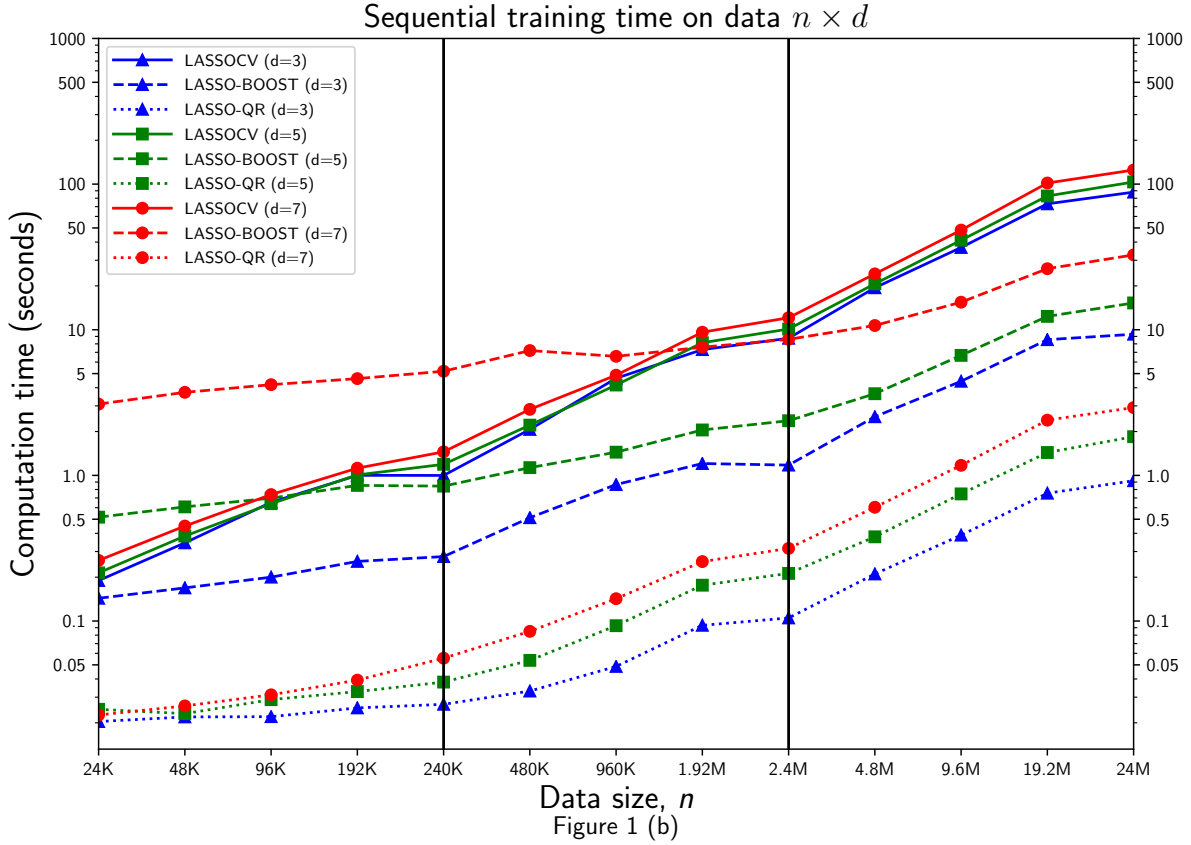

Figure 1: Sequential training time (a)Ridge (b)LASSO

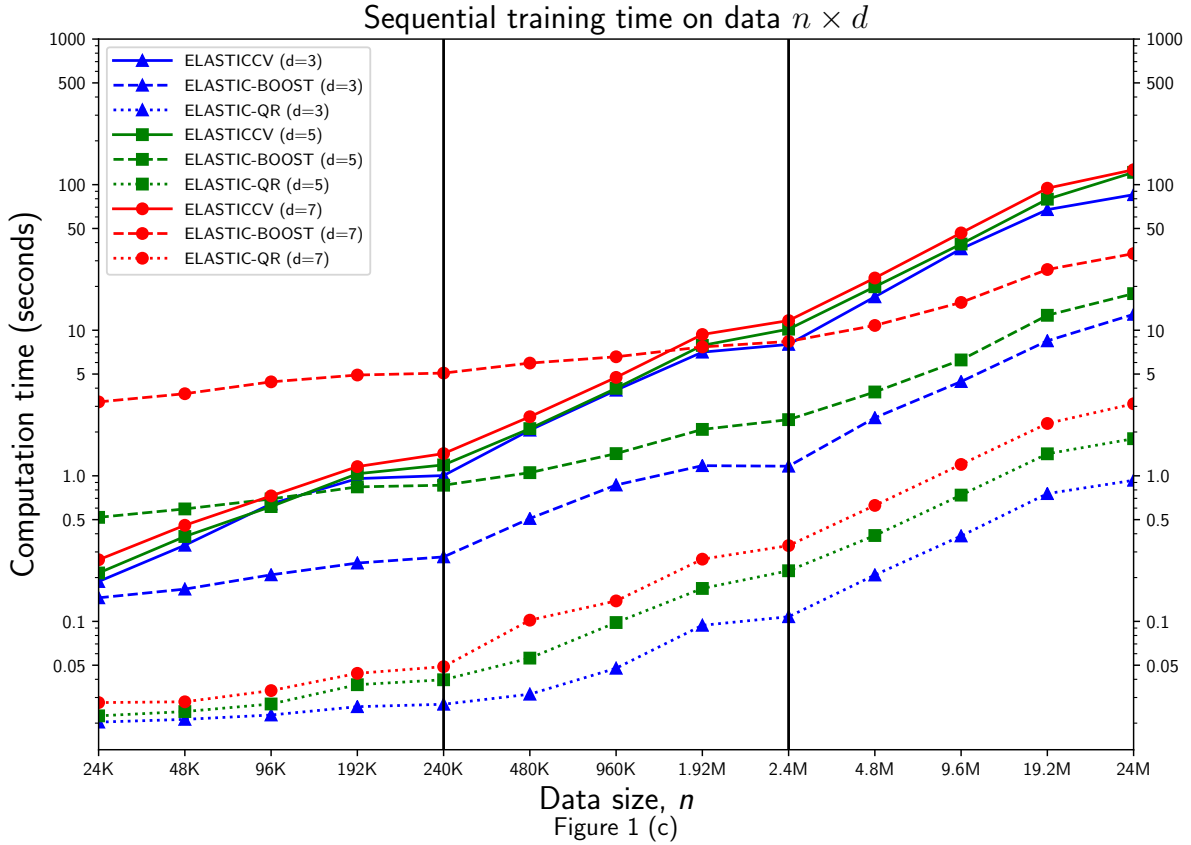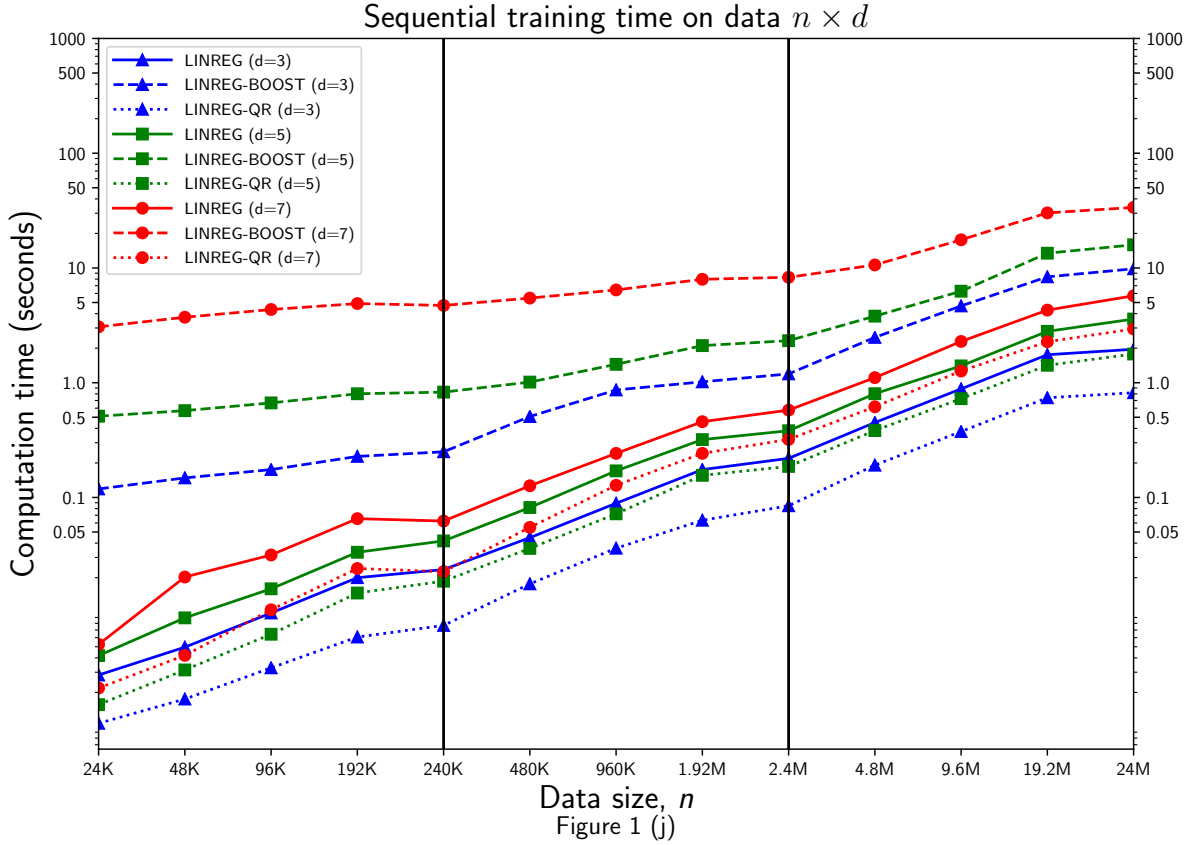

Figure 1: Sequential training time (c)Elastic-net (j)Linear Regression

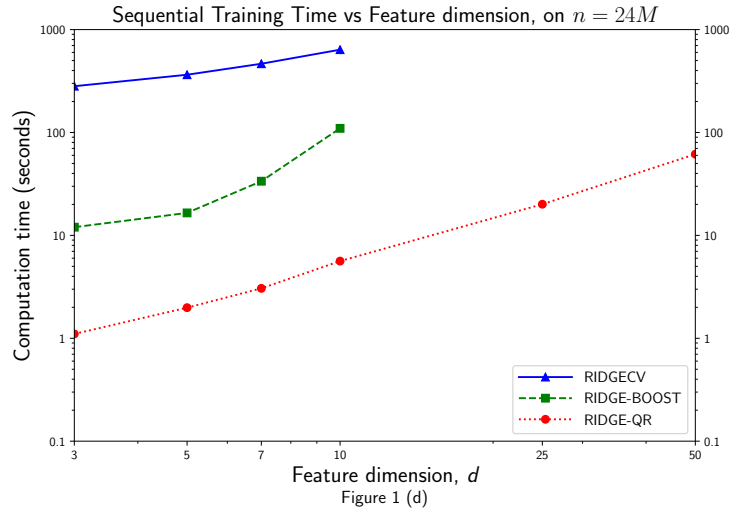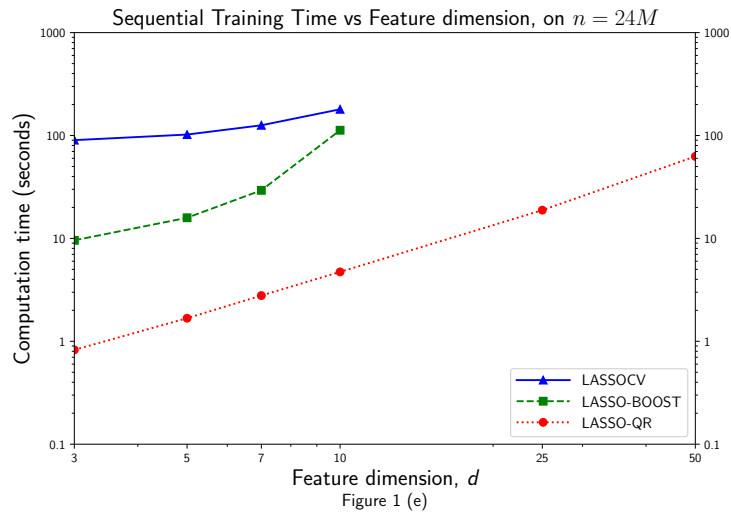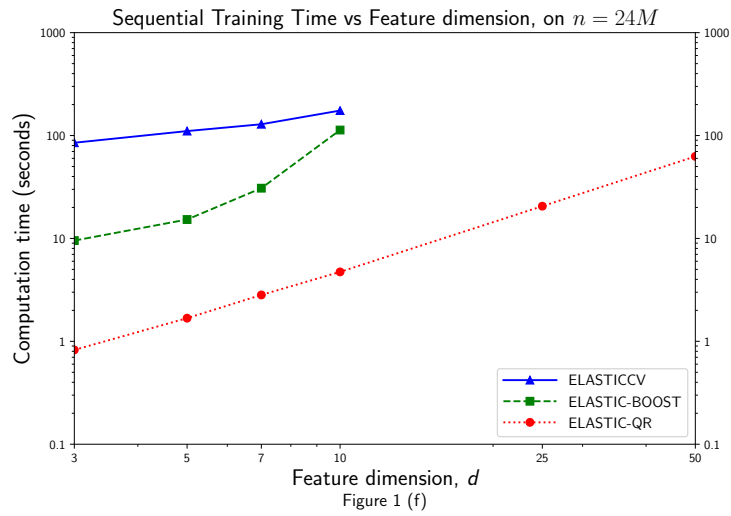

Figure 1: Sequential training time on  $n = 24M$ , and various feature dimension  $d = \{3, 5, 7, 10, 25, 50\}$  (d) Ridge, (e) LASSO, (f) Elastic-net



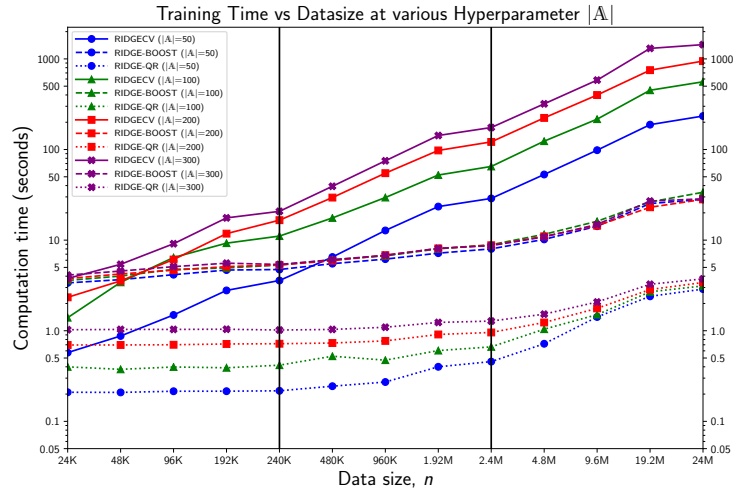

Figure 1 (g)

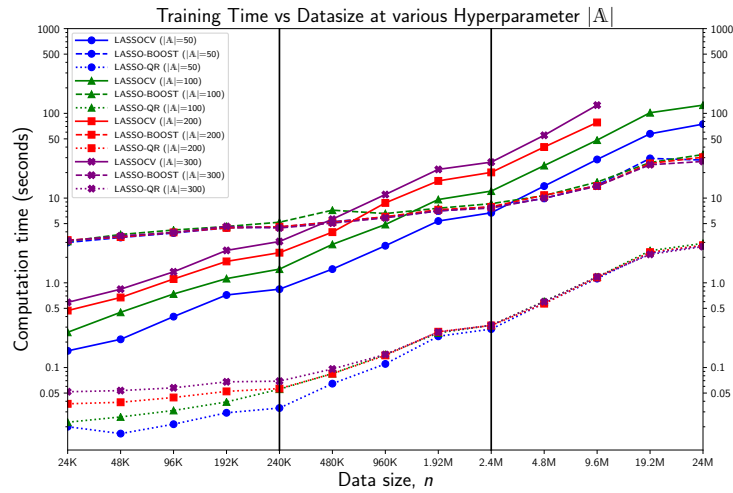

Figure 1 (h)

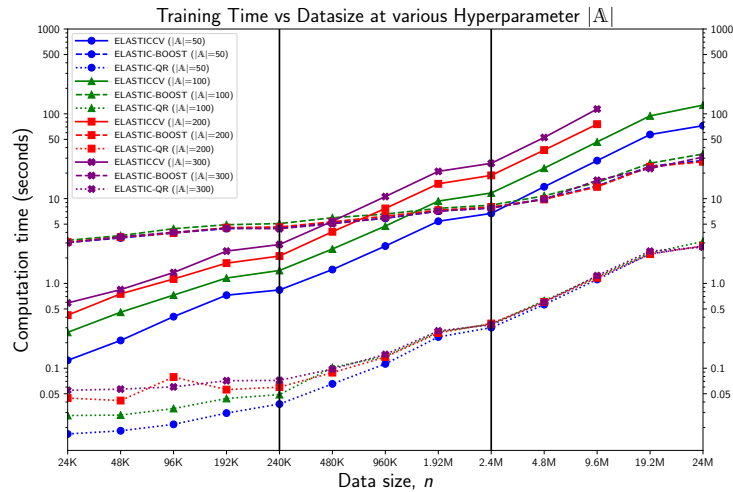

Figure 1 (i)

Figure 1: Sequential training time for various hyper-parameter set size  $|A|$  (g) Ridge, (h) LASSO, (i) Elastic-net

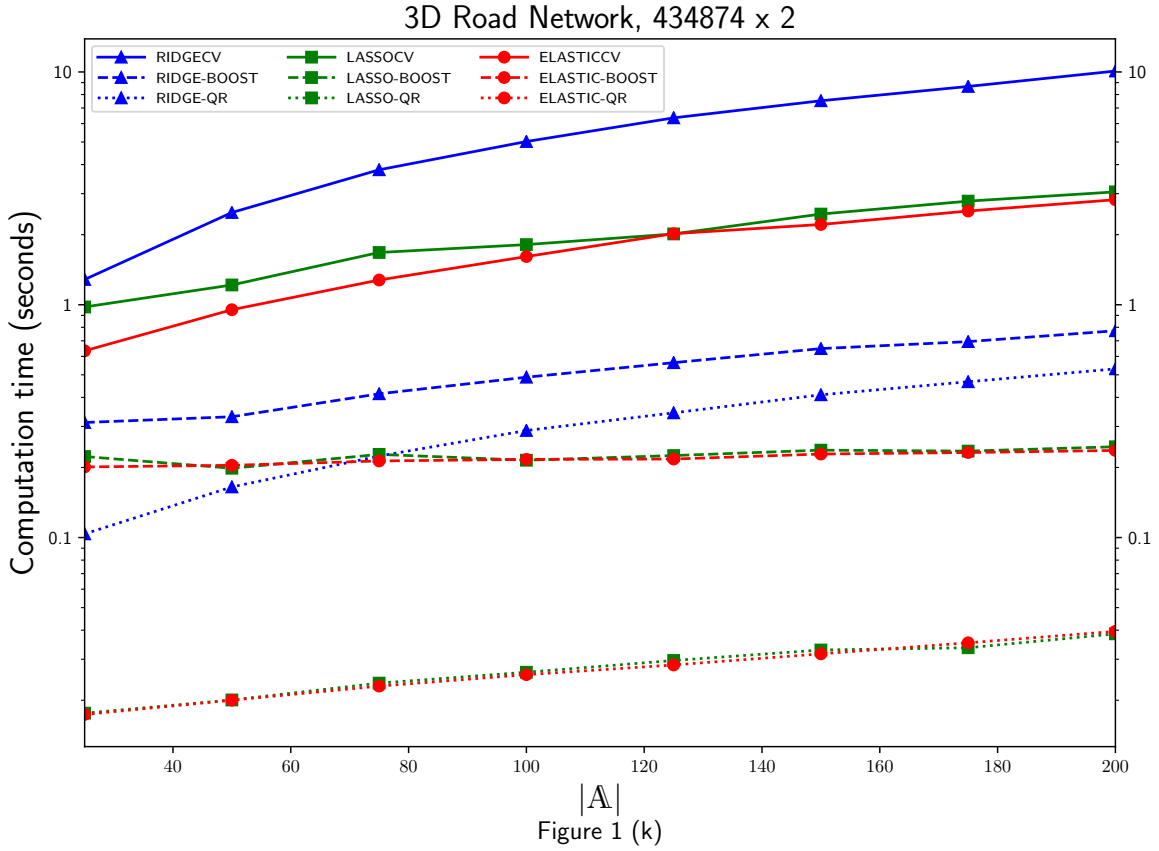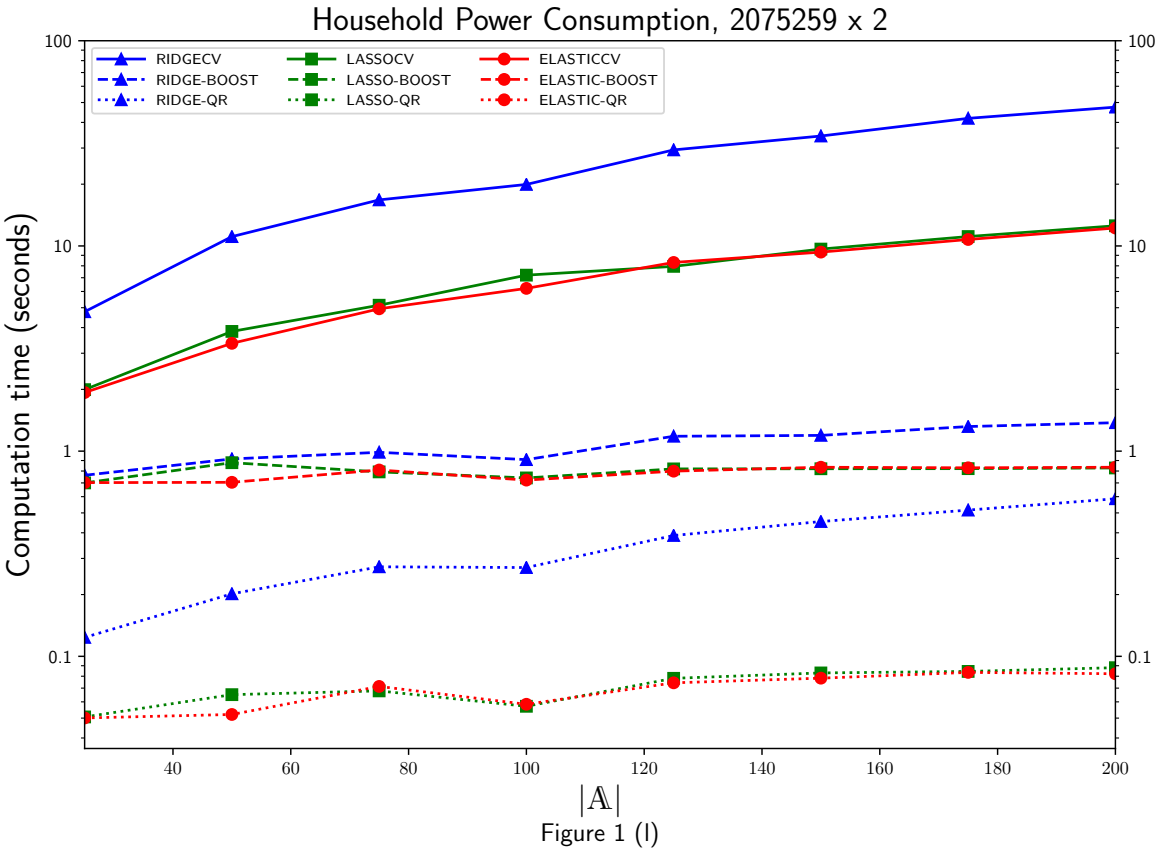

Figure 1: Sequential training time for various hyper-parameter set size  $|\mathbb{A}|$  (k) 3D Road Network dataset (l) Household Power Consumption dataset

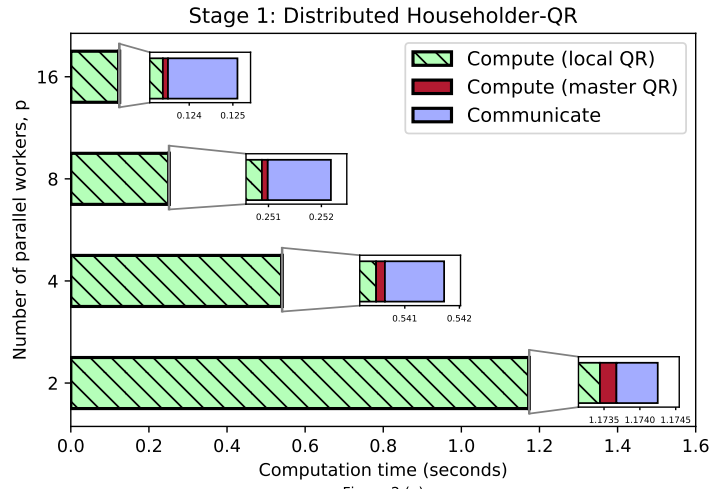

Figure 2 (a)

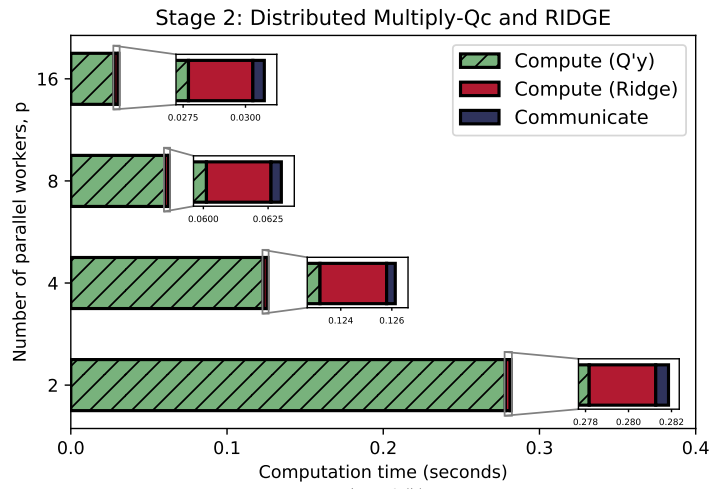

Figure 2 (b)

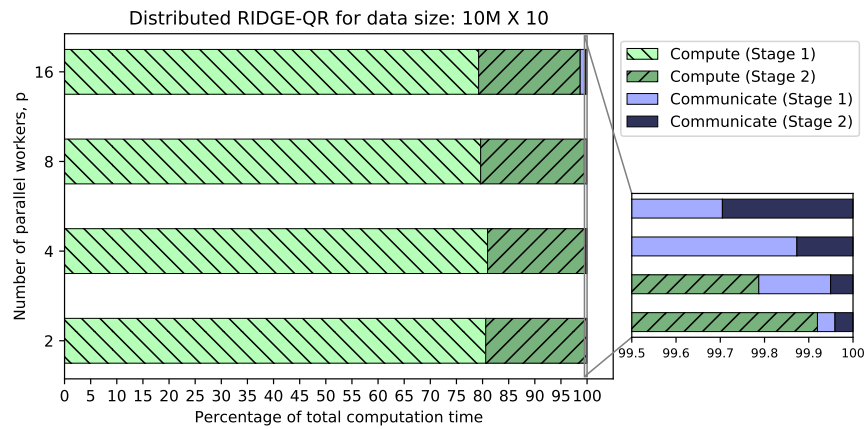

Figure 2 (c)

Figure 2: Training time analysis for DISTRIBUTED RIDGE-QR with zoomed insets depicting communication time (a): Stage 1: DISTRIBUTED HOUSEHOLDER-QR timings, (b): Stage 2: DISTRIBUTED MULTIPLY-QC and RIDGE solver timings, (c): Combined timing percentage spent on each stage for computation and communication

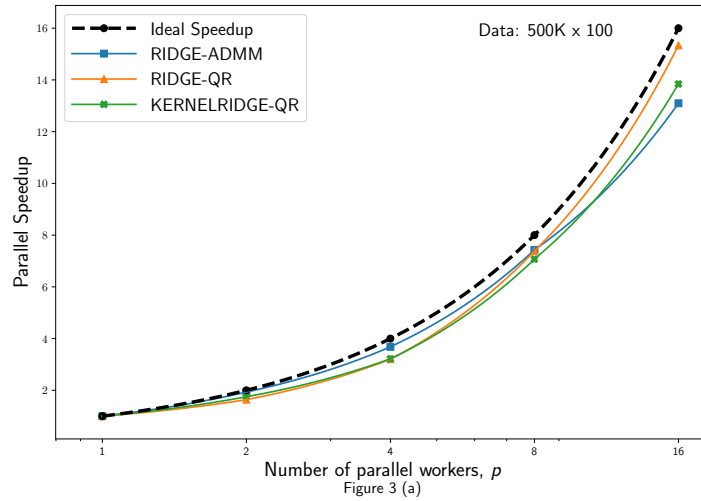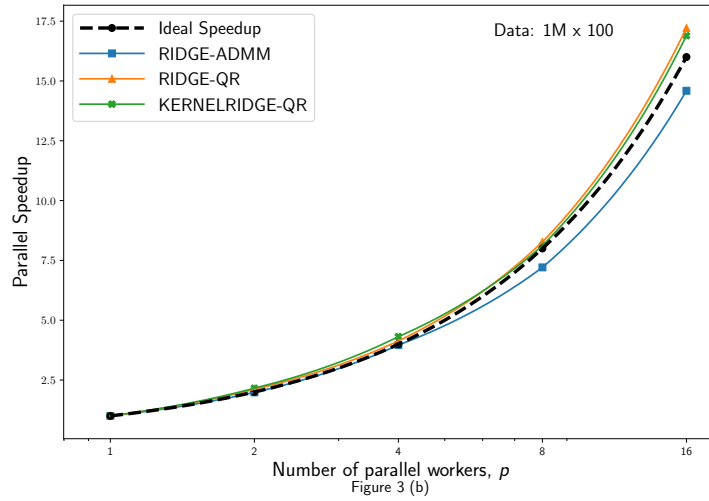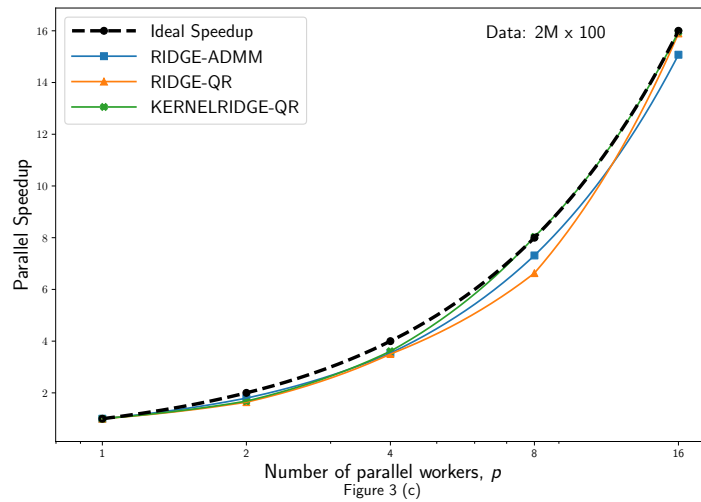

Figure 3: (**Scalability**) Parallel speedup for DISTRIBUTED RIDGR-QR on synthetic datasets of size (a)  $500K \times 100$  (b)  $1M \times 100$  (c)  $2M \times 100$

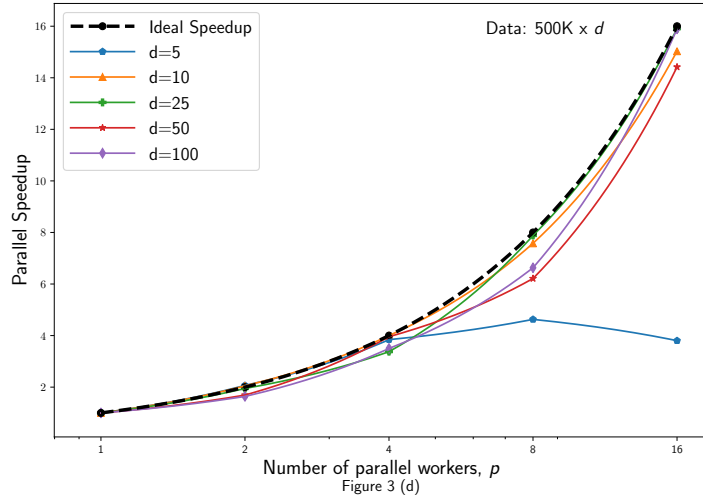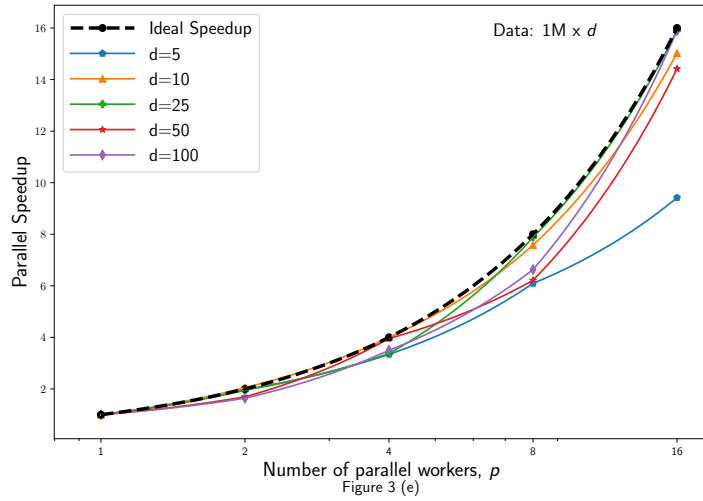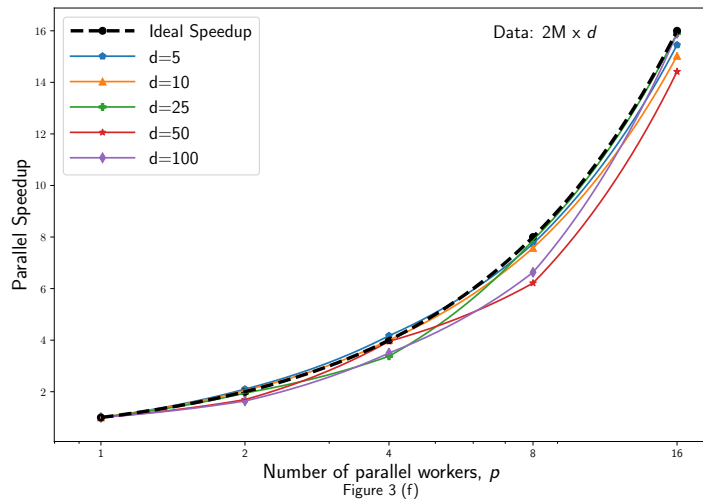

Figure 3: (**Scalability**) Parallel speedup for DISTRIBUTED RIDGR-QR on synthetic datasets for various feature dimension size  $d = \{5, 10, 25, 50, 100\}$  (d)  $500K \times d$  (e)  $1M \times d$  (f)  $2M \times d$

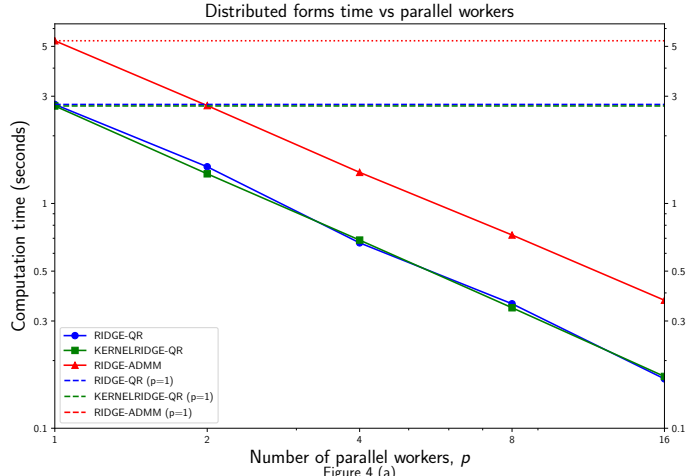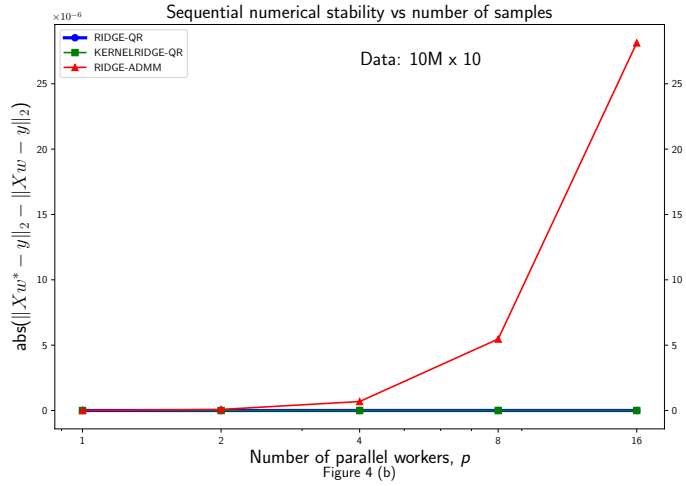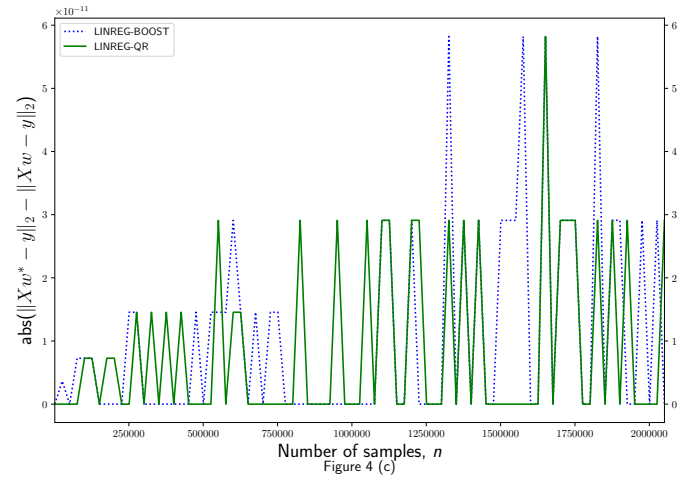

Figure 4: (a): Comparing distributed implementations of RIDGE-QR, KERNELRIDGE-QR (linear kernel), and RIDGE-ADMM for  $10M \times 10$  synthetic data based on (a) Computation time (b) Accuracy ( $\times 10^{-6}$ ),  $w^*$  comparison of RIDGE-QR and RIDGE-BOOST,  $w^*$  is solution from scikit-learn RIDGE. (c) Accuracy ( $\times 10^{-11}$ ) comparison of LINREG-QR and LINREG-BOOST on Household Power Consumption dataset ( $\sim 2M \times 8$ ),  $w^*$  is solution from scikit-learn LINEARREGRESSION

## C. Algorithms

---

**Algorithm 1:** HOUSEHOLDER-SKETCH( $X, y$ ); see Theorem 2.2

---

**Input:** A matrix  $X \in \mathbb{R}^{n \times d}$ , a vector  $y \in \mathbb{R}^n$   
**Output:** A matrix  $R \in \mathbb{R}^{d \times d}$  is upper triangular such that  $X^T X = R^T R$ , and a vector  $\bar{y} \in \mathbb{R}^d$  is top  $d$  elements of the reflected vector  $Q^T y$

- 1  $(\mathcal{V}, R) := \text{HOUSEHOLDER-QR}(X)$  // see Theorem 2.1, Algorithm 4
- 2  $\bar{y} := \text{MULTIPLY-QC}(\mathcal{V}, y, \text{'T'})$  // implicit  $Q^T y$ , see (Golub & Van Loan, 2012), see Algorithm 5
- 3  $R \leftarrow R[0:d, :]$  //  $d \times d$  triangular block
- 4  $\bar{y} \leftarrow \bar{y}[0:d]$  // top  $d$  elements
- 5 **return**  $(R, \bar{y})$

---

**Algorithm 2:** LMS-QR( $X, y, \text{params}$ )

---

**Input:** A matrix  $X \in \mathbb{R}^{n \times d}$ , a vector  $y \in \mathbb{R}^n$ , and a list of LMS parameters,  $\text{params}$   
**Output:** A vector of model coefficients,  $w \in \mathbb{R}^d$

- 1  $(R, \bar{y}) := \text{HOUSEHOLDER-SKETCH}(X, y)$  // see Algorithm 1
- 2  $w := \text{LMS}(R, \bar{y}, \text{params})$  // LINREG, RIDGECV, LASSOCV, ELASTICCV in scikit-learn
- 3 **return**  $w$

---

**Algorithm 3:** DISTRIBUTED LMS-QR( $p, X, y, \text{params}$ )

---

**Input:** A scalar  $p > 0$  parallel workers (cores or users), a matrix  $X = (X_1^T | \dots | X_p^T)^T$ ,  $X_i \in \mathbb{R}^{\frac{n}{p} \times d}$ , a vector  $y = (y_1^T | \dots | y_p^T)^T$ ,  $y_i \in \mathbb{R}^{\frac{n}{p}}$ , a list of LMS parameters,  $\text{params}$   
**Output:** A vector of model coefficients,  $w \in \mathbb{R}^d$

//  $(\mathcal{V}, \mathbf{R}) := \text{DISTRIBUTED HOUSEHOLDER-QR}(\mathbf{X})$ , see Theorem 3.1

- 1 **for** every worker  $i \in \{1, 2, \dots, p\}$  **do**
- 2      $(\mathcal{V}_i, R_i) := \text{HOUSEHOLDER-QR}(X_i)$  // see Theorem 2.1
- 3      $R_i \leftarrow R_i[0:d, :]$  //  $d \times d$  triangular block
- 4      $R_{\text{stack}} := \text{GATHER}(R_i, \text{root} = 0)$  //  $R_{\text{stack}} = \text{vstack}(R_1, \dots, R_p)$  at Master
- 5 **end**
- 6 **if**  $i == 1$  **then** // check for Master
- 7      $(\mathcal{V}_M, R_M) := \text{HOUSEHOLDER-QR}(R_{\text{stack}})$  // see Theorem 2.1
- 8      $R_M \leftarrow R_M[0:d, :]$  //  $d \times d$  triangular block
- 9 **end**
- //  $\mathcal{V} := [\mathcal{V}_1, \dots, \mathcal{V}_p, \mathcal{V}_M]$  is never centralized or shared
- //  $Q = \text{diag}(Q_1, \dots, Q_p)Q_M$ , and,  $R = R_M$ , see Theorem 3.1
- //  $\bar{\mathbf{y}} := \text{DISTRIBUTED MULTIPLY-QC}(\mathcal{V}, \mathbf{y}, \text{'T'})$ , see Corollary 3.1.1
- 10 **for** every worker  $i \in \{1, 2, \dots, p\}$  **do**
- 11      $\bar{y}_i := \text{MULTIPLY-QC}(\mathcal{V}_i, y_i, \text{'T'})$  // implicit  $Q_i^T y_i$ , see Algorithm 5
- 12      $\bar{y}_i \leftarrow \bar{y}_i[0:d]$  // select top  $d$  elements
- 13      $\bar{y}_{\text{stack}} := \text{GATHER}(\bar{y}_i, \text{root} = 0)$  //  $\bar{y}_{\text{stack}} = \text{vstack}(\bar{y}_1, \dots, \bar{y}_p)$  at Master
- 14     **if**  $i == 1$  **then** // check for Master
- 15          $\bar{y}_M := \text{MULTIPLY-QC}(\mathcal{V}_M, \bar{y}_{\text{stack}}, \text{'T'})$  // implicit  $Q_M^T \bar{y}_{\text{stack}}$ , see Algorithm 5
- 16          $\bar{y}_M \leftarrow \bar{y}_M[0:d]$  // select top  $d$  elements
- 17     **end**
- 18 **end**
- 19  $\bar{y} := \bar{y}_M$  //  $\bar{y} = Q^T y = Q_M^T ((Q_1^T y_1)^T | \dots | (Q_p^T y_p)^T)^T$
- // **Solving LMS**
- 20 **if**  $i == 1$  **then** // check for Master
- 21      $w := \text{LMS}(R, \bar{y}, \text{params})$  // run LMS solver at Master
- 22     **BROADCAST**( $w, \text{root} = 0$ ) // every worker receives the global model
- 23 **end**
- 24 **return**  $w$

---

---

**Algorithm 4:**  $(\mathcal{V}, R) \leftarrow X$ , via HOUSEHOLDER-QR, refer Theorem 2.1

---

**Input:** A matrix  $X \in \mathbb{R}^{n \times d}$   
**Output:** Householder reflector set  $\mathcal{V}$ , Upper trapezoidal matrix  $R \in \mathbb{R}^{n \times d}$

```
1 for  $j \leftarrow 1$  to  $d$  do
2    $v_j \leftarrow X(j : n, j)$ 
3    $v_j(1) \leftarrow v_j(1) + \text{sign}(v_j(1)) \times \|v_j\|_2$  // scalar update
4    $v_j \leftarrow \frac{v_j}{\|v_j\|_2}$  // vector normalization
5    $X(j : n, j : d) \leftarrow X(j : n, j : d) - 2 \times v_j < v_j, X(j : n, j : d) >$ 
6    $R = X(j : n, j : d)$ 
7 end
8  $\mathcal{V} \leftarrow [v_1, v_2, \dots, v_d]$  // set of d-reflectors
9 return  $(\mathcal{V}, R)$ 
```

---

---

**Algorithm 5:** Computing implicit  $Q^T y$  via MULTIPLY-QC

---

**Input:** Householder reflector set  $\mathcal{V}$ , a vector  $y \in \mathbb{R}^n$   
**Output:**  $\bar{y} \leftarrow (Q^T y) \in \mathbb{R}^n$

```
1  $c \leftarrow y$ 
2 for  $j \leftarrow 1$  to  $d$  do
3    $c(j : n) \leftarrow c(j : n) - 2 \times v_j(v_j^T c(j : n))$ 
4 end
5  $\bar{y} \leftarrow c$ 
6 return  $\bar{y}$ 
```

---

## References

- Burges, C. J. A tutorial on support vector machines for pattern recognition. *Data mining and knowledge discovery*, 2(2):121–167, 1998.
- Dass, J., Sarin, V., and Mahapatra, R. N. Fast and communication-efficient algorithm for distributed support vector machine training. *IEEE Transactions on Parallel and Distributed Systems*, 30(5):1065–1076, 2018.
- Golub, G. H. and Van Loan, C. F. *Matrix computations*, volume 3. JHU press, 2012.
- Si, S., Hsieh, C.-J., and Dhillon, I. S. Memory efficient kernel approximation. *The Journal of Machine Learning Research*, 18(1):682–713, 2017.
- Williams, C. K. and Seeger, M. Using the nyström method to speed up kernel machines. In *Advances in neural information processing systems*, pp. 682–688, 2001.
